# Supplementary material
Source: publisher figshare collection journal article supplement (https://geolsoc.figshare.com/articles/dataset/_/3453617)

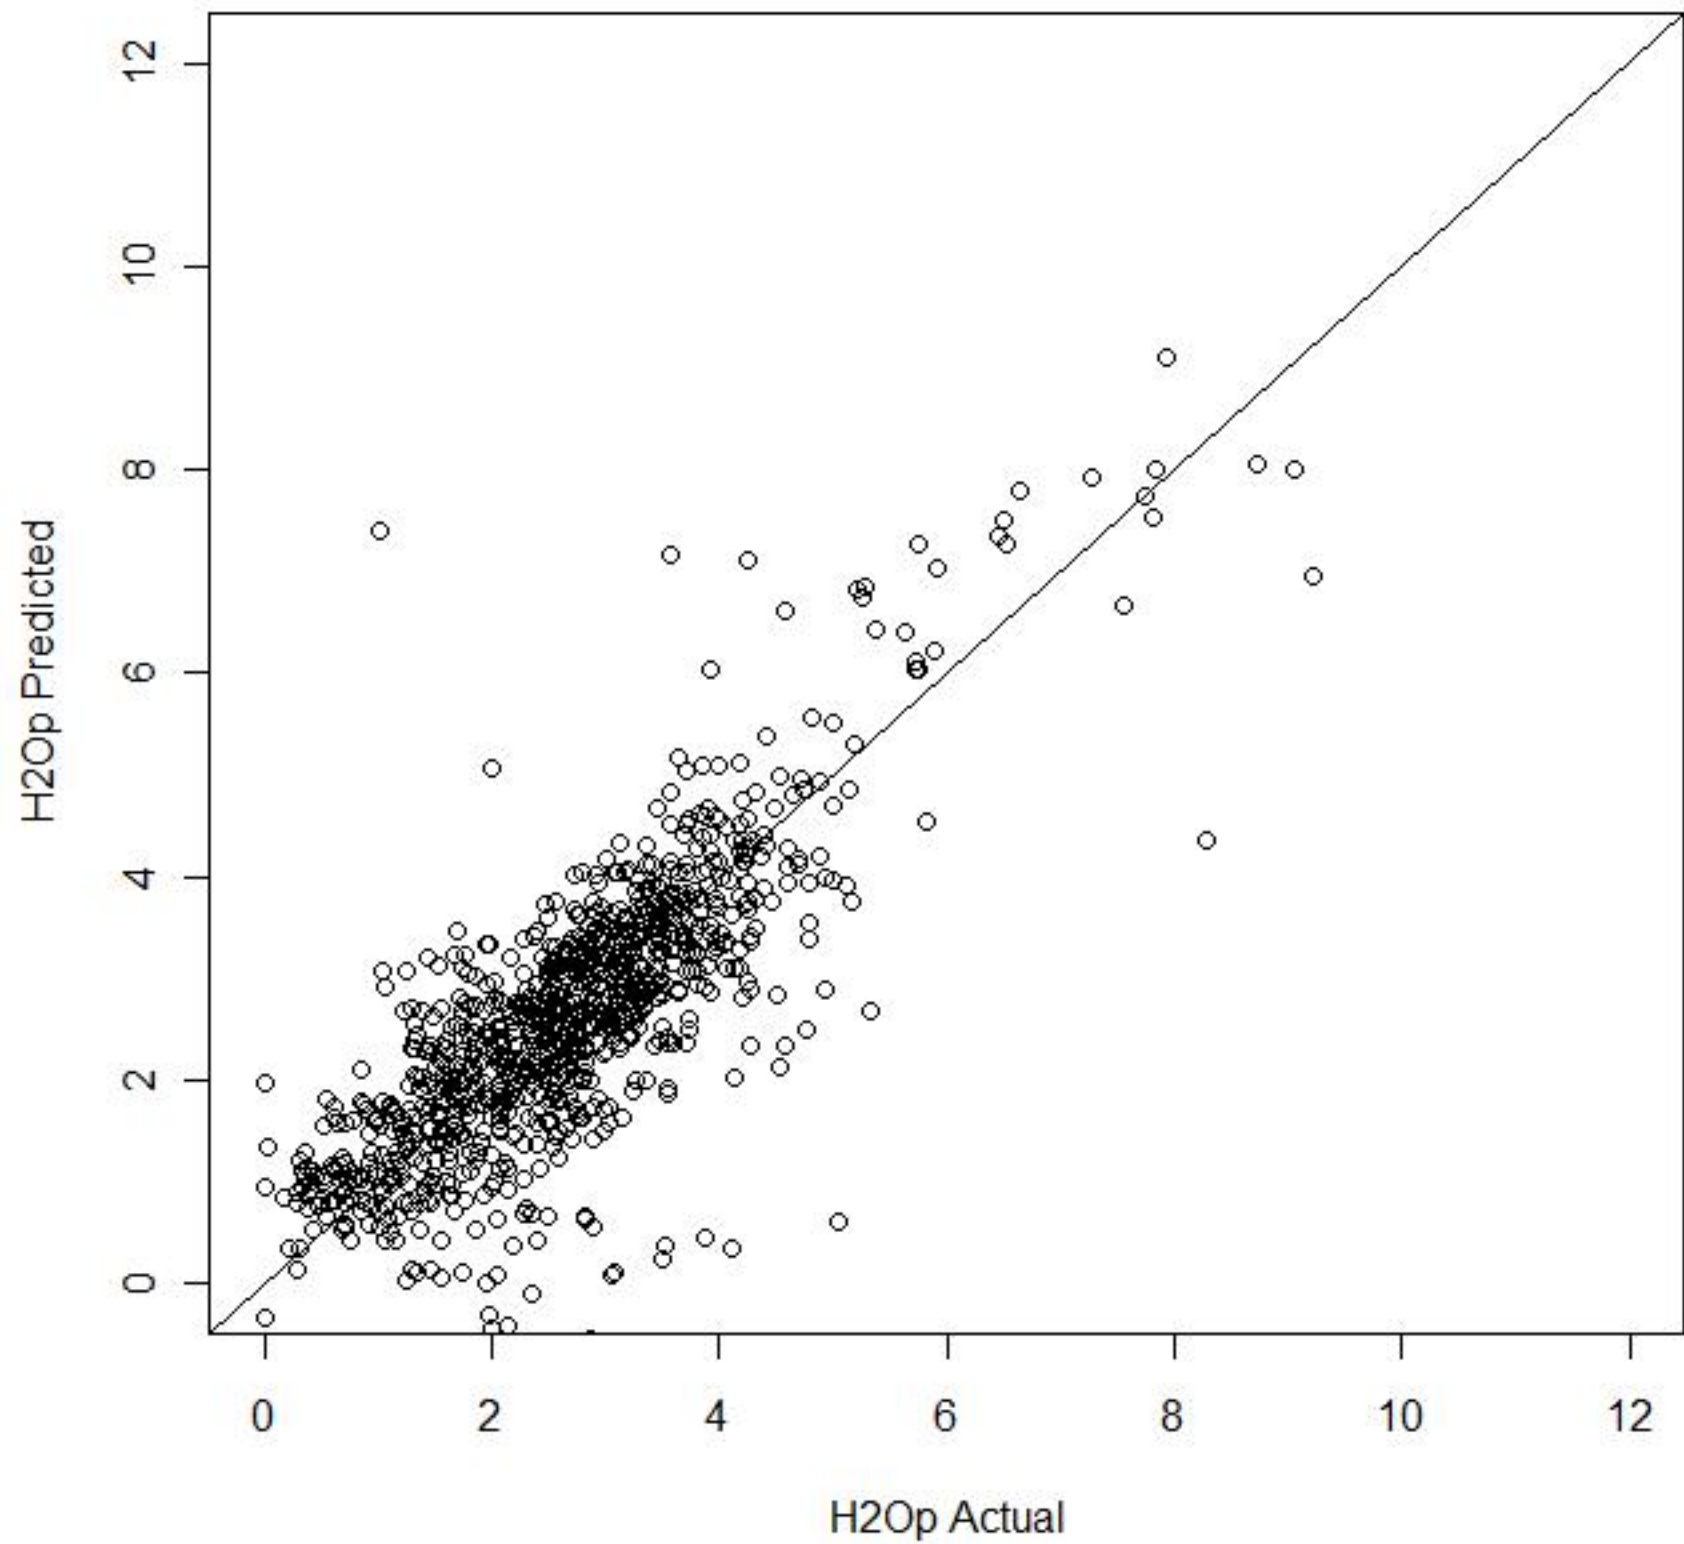

Supplement: Supplementary file 1 [file 1]

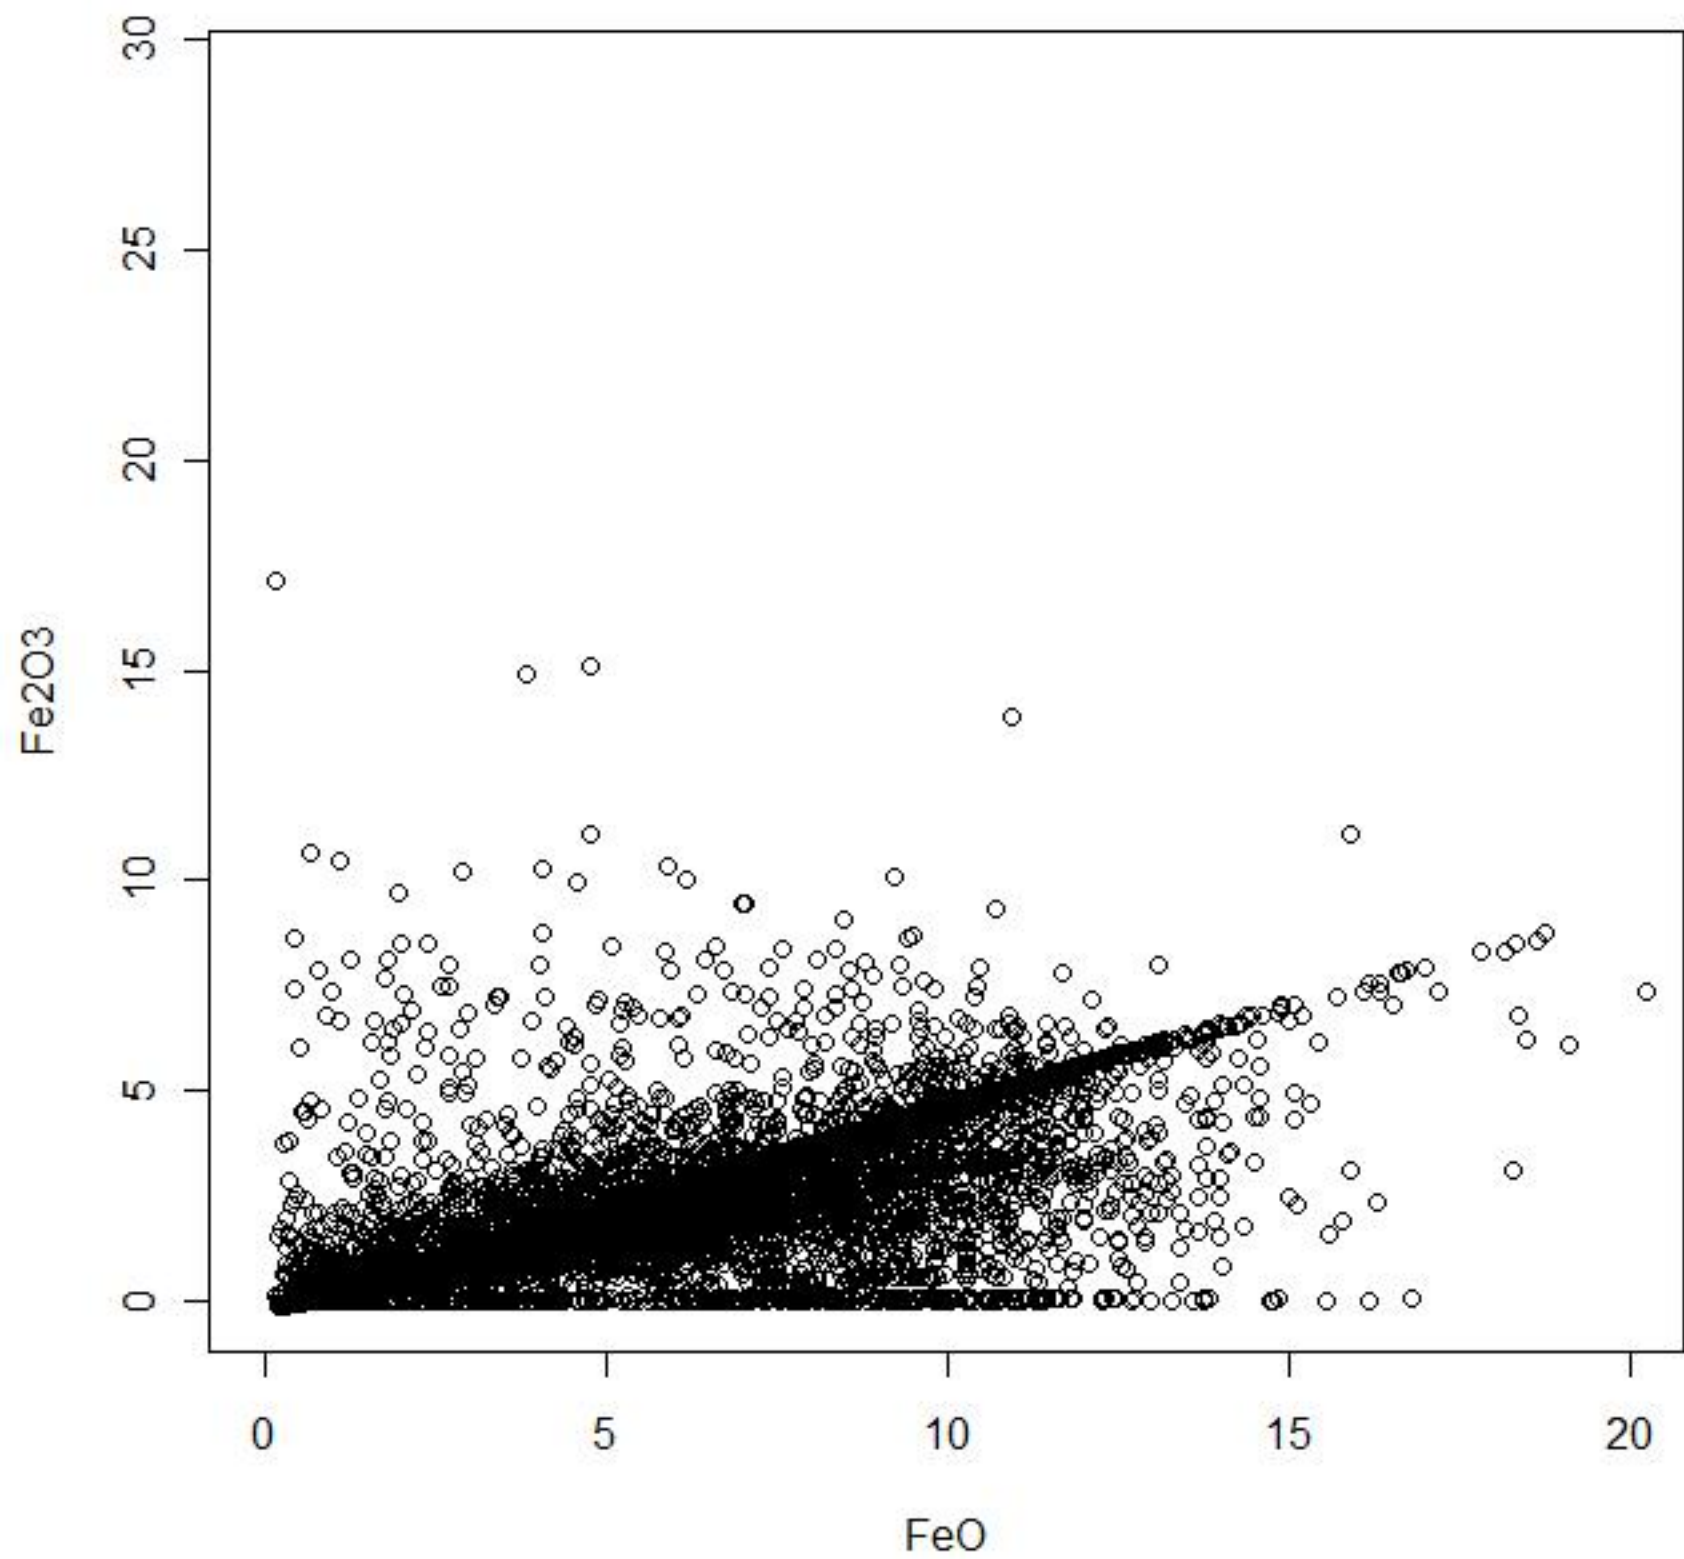

Supplement: Supplementary file 2 [file 1]

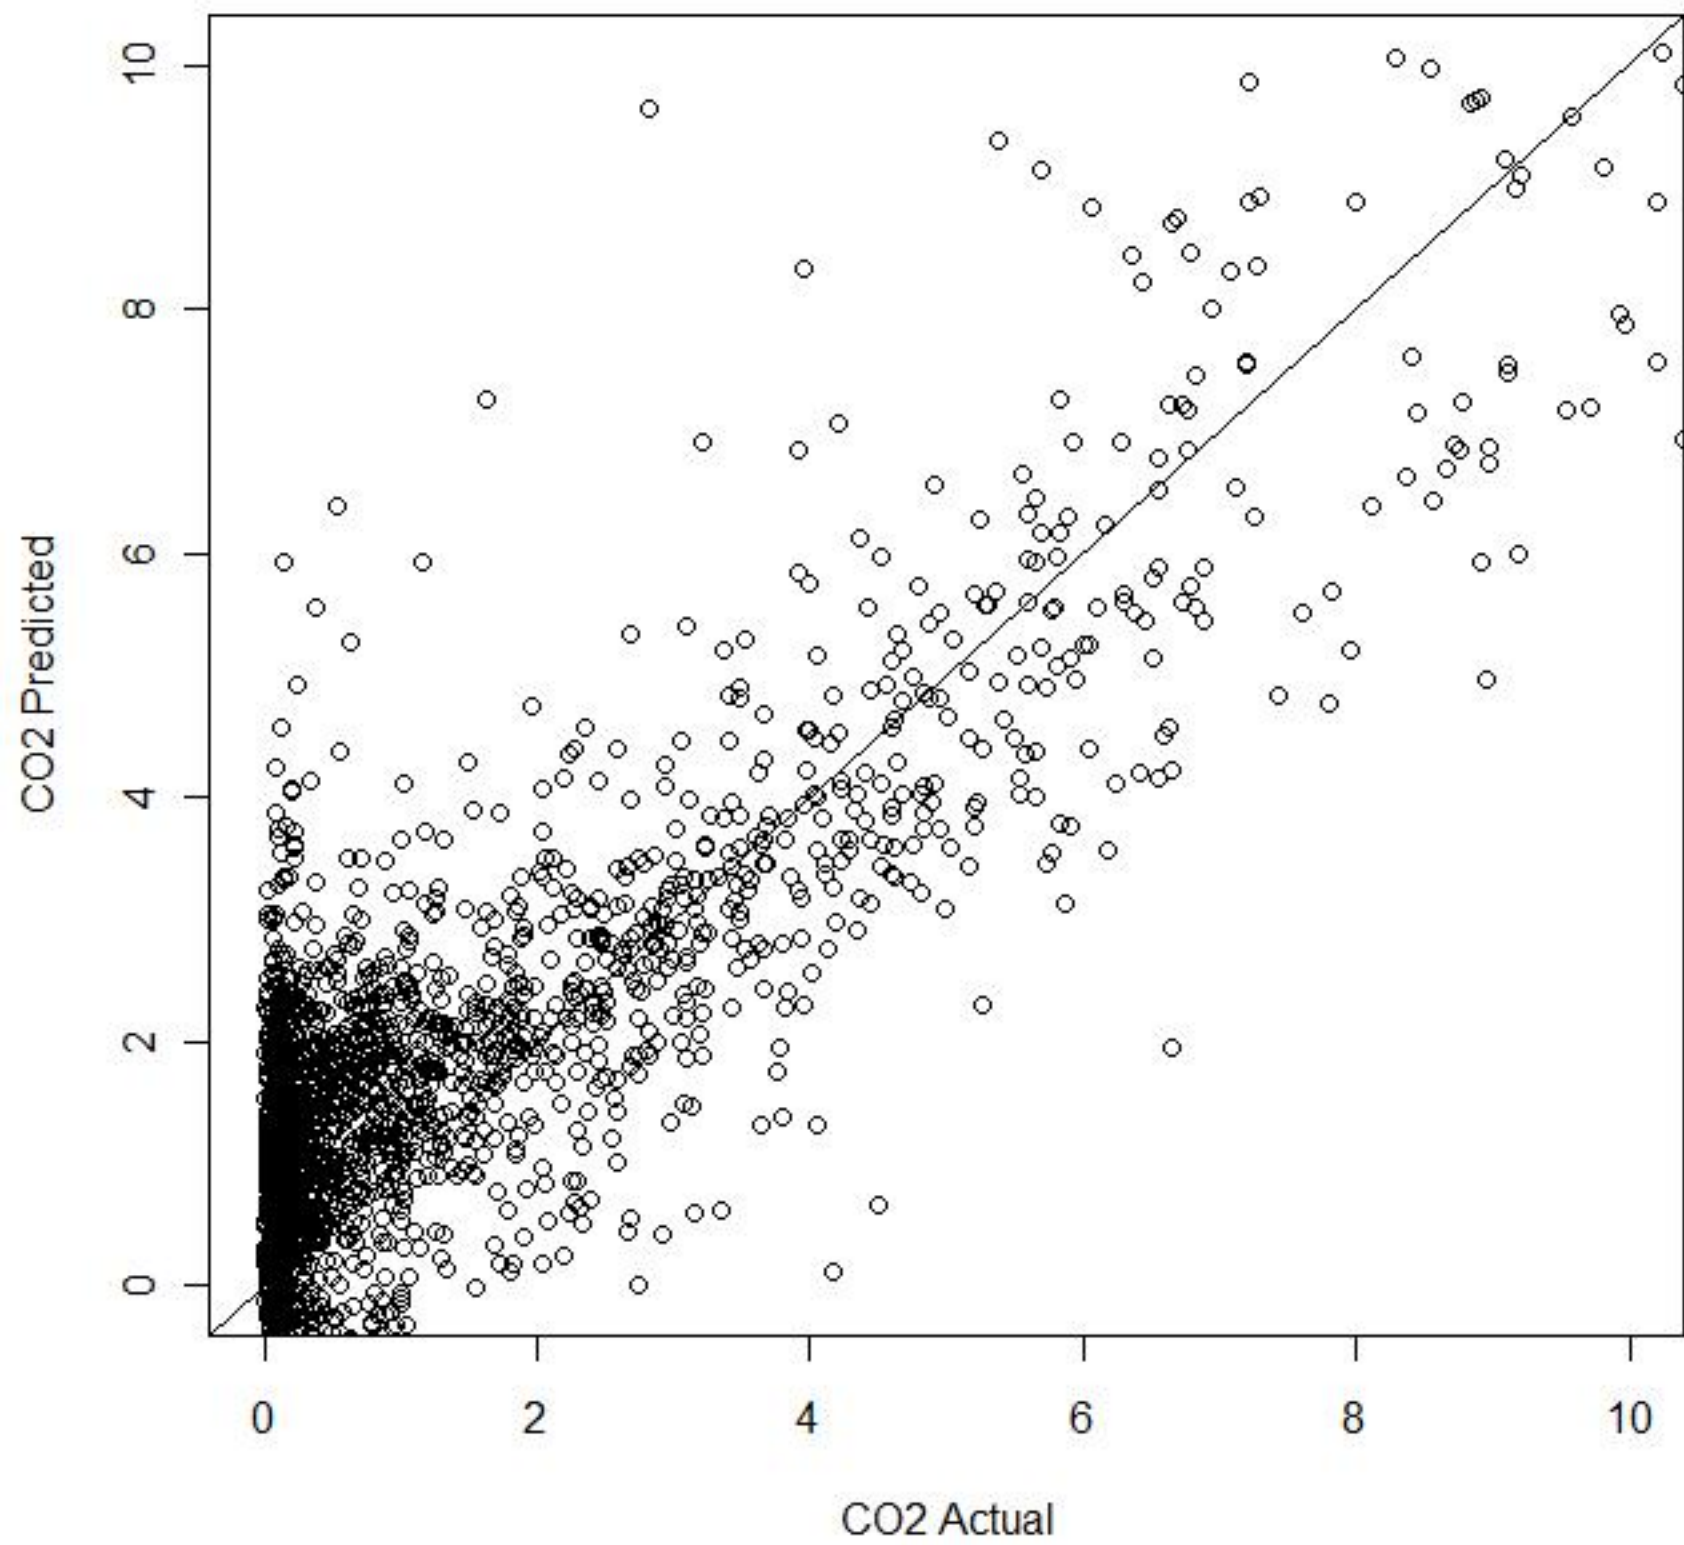

Supplement: Supplementary file 3 [file 1]

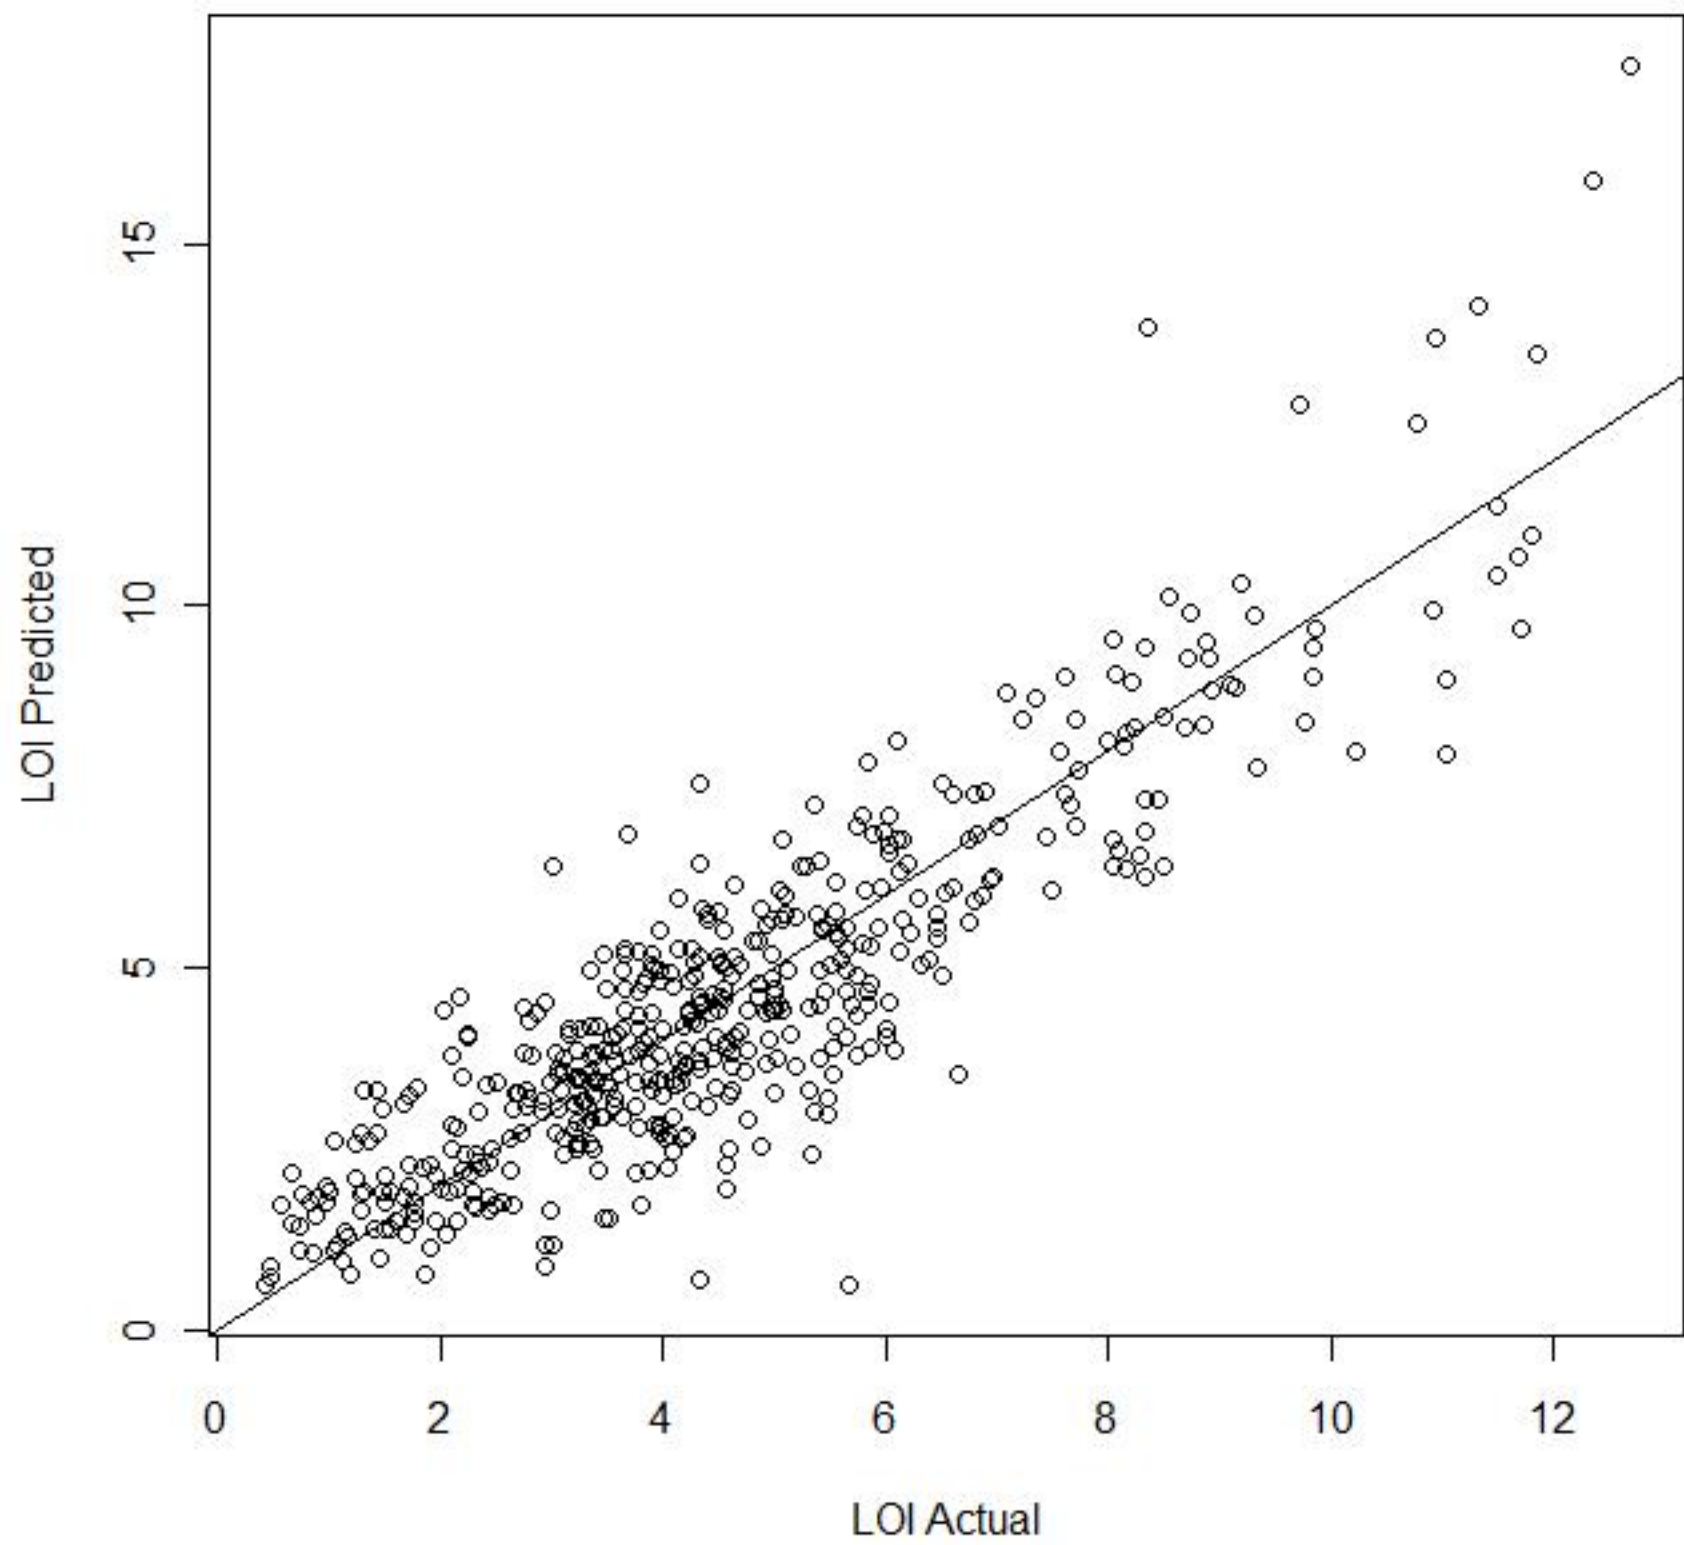

Supplement: Supplementary file 4 [file 1]

# Fe<sub>2</sub>O<sub>3</sub>T/Fe<sub>2</sub>O<sub>3</sub>

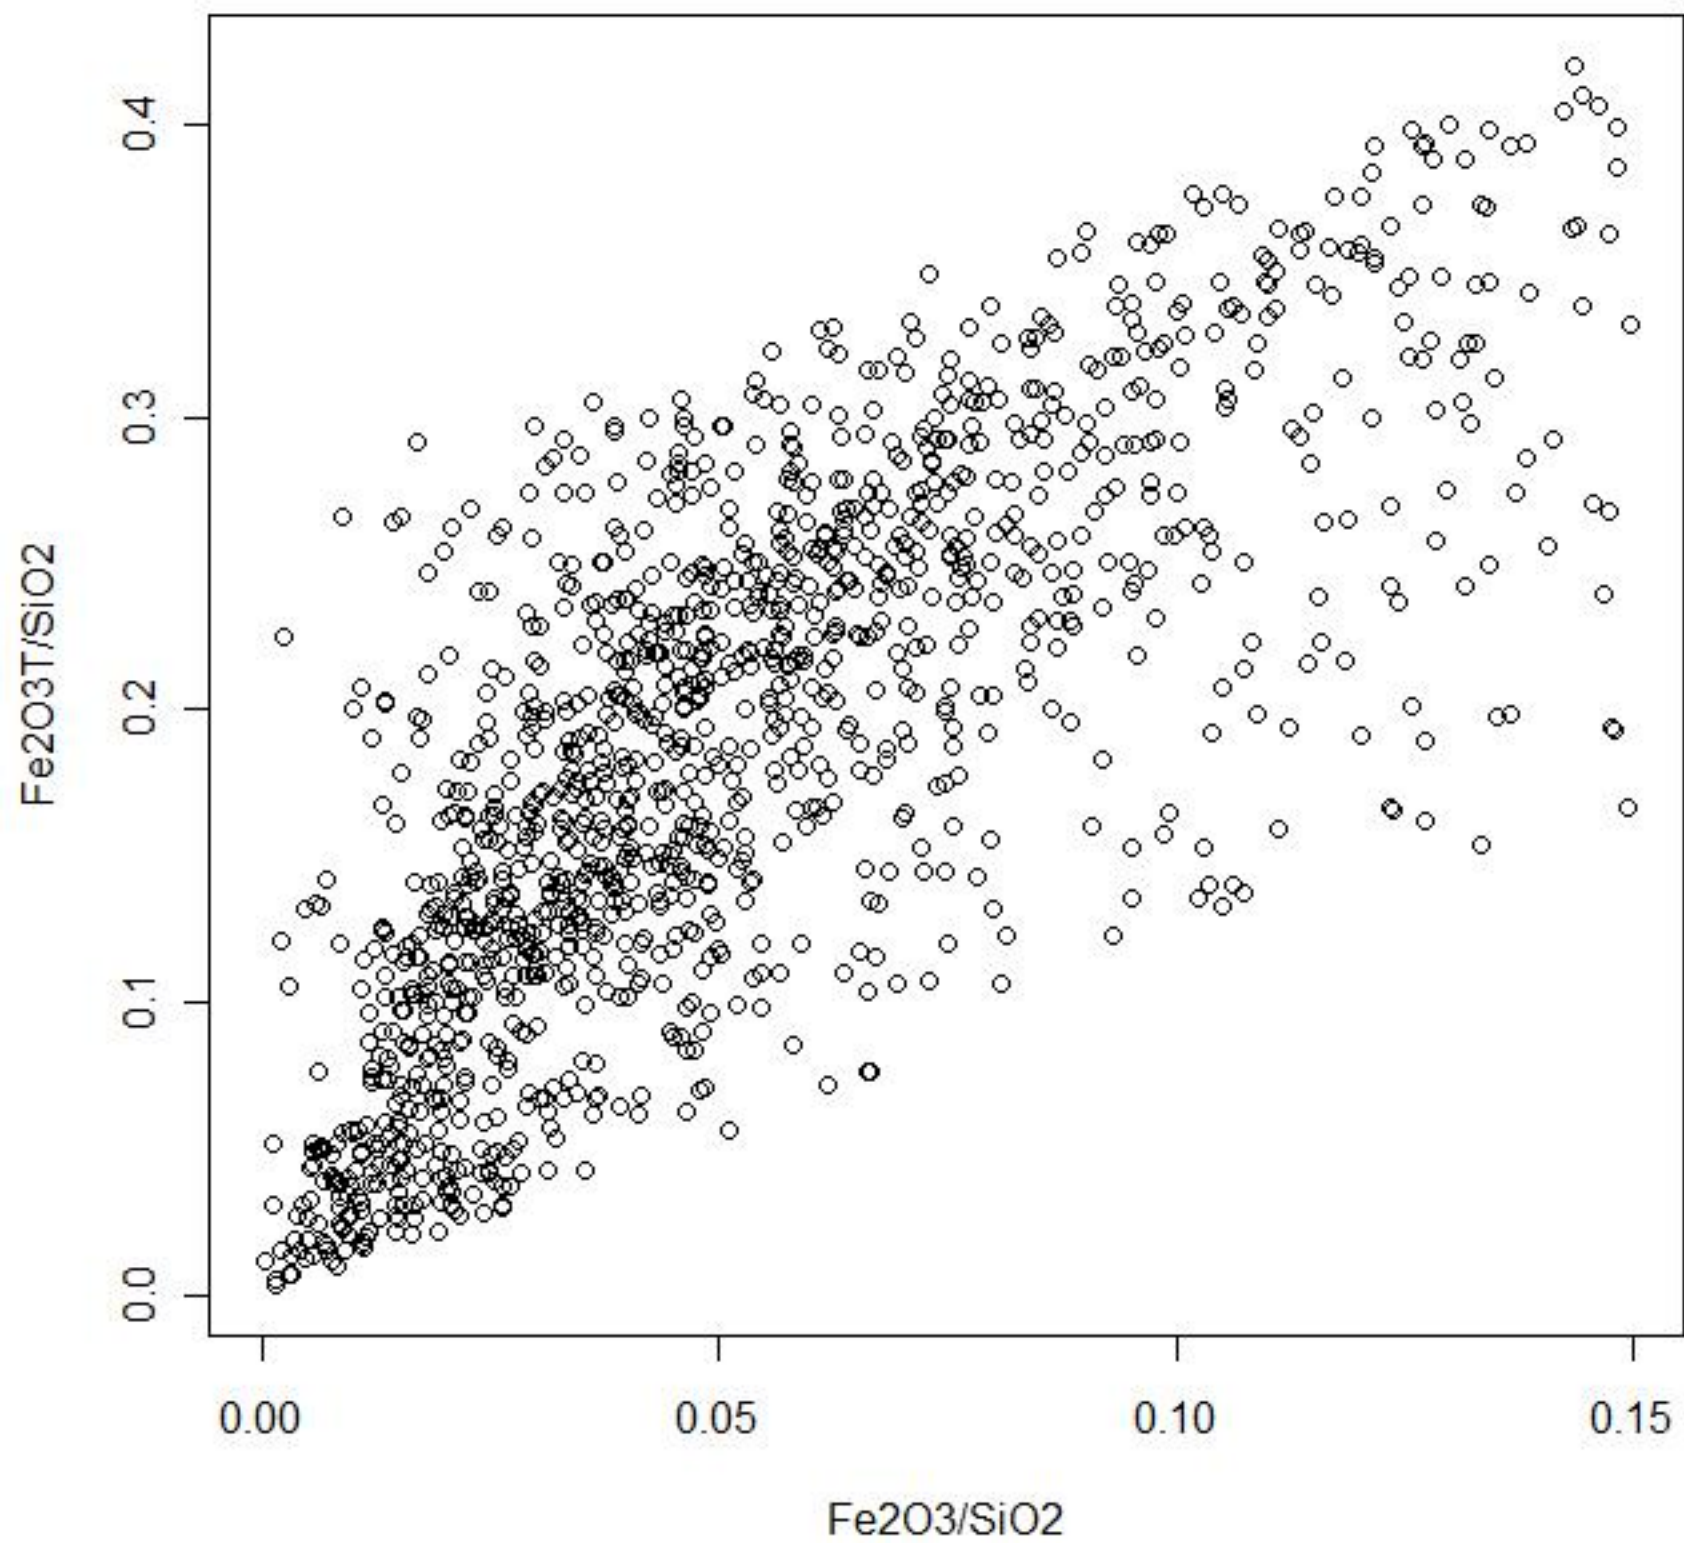

# Trimmed Fe2O3

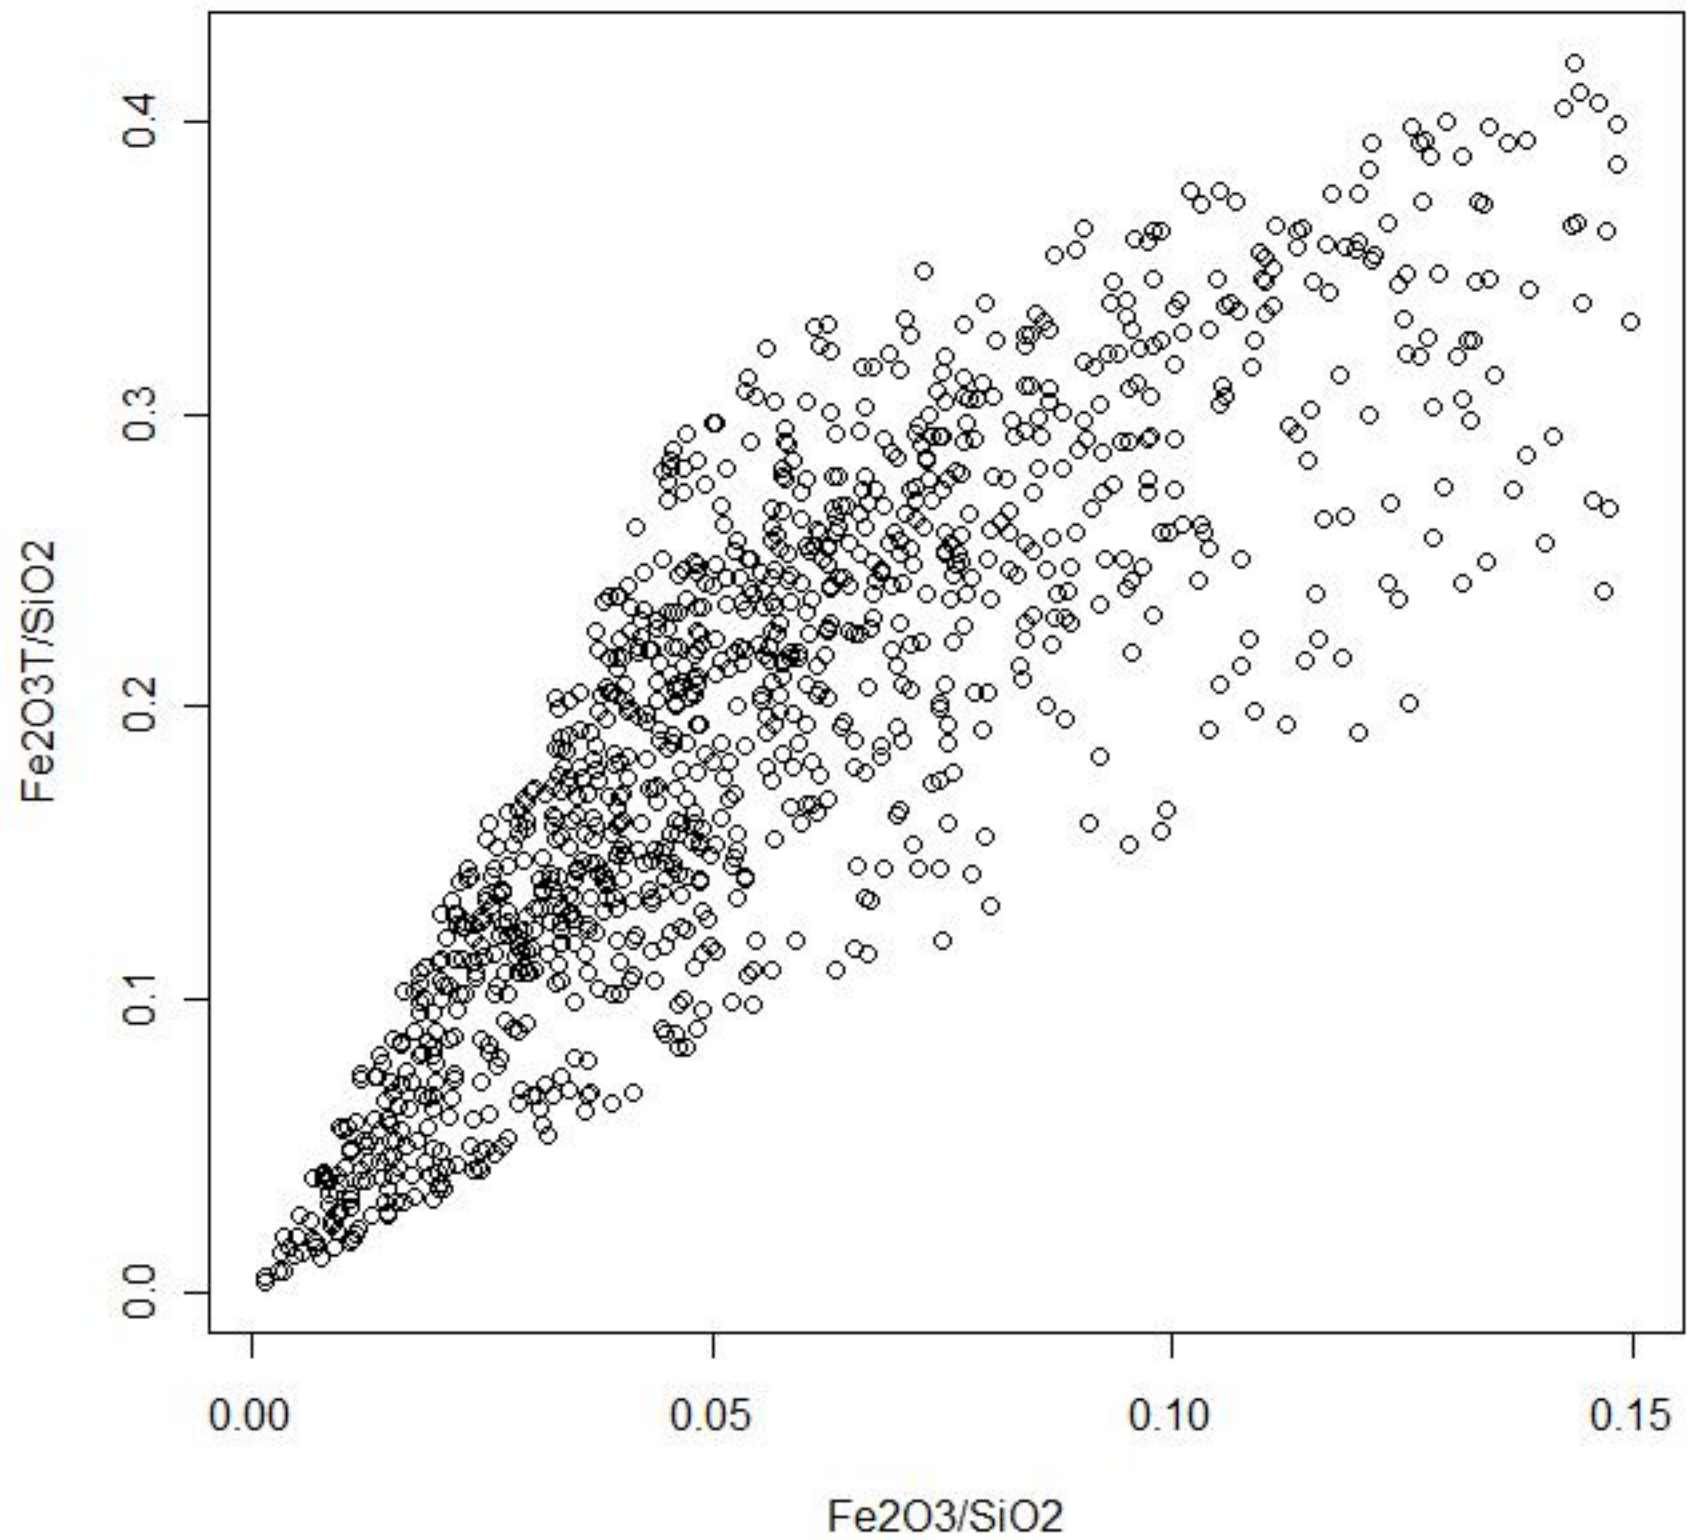

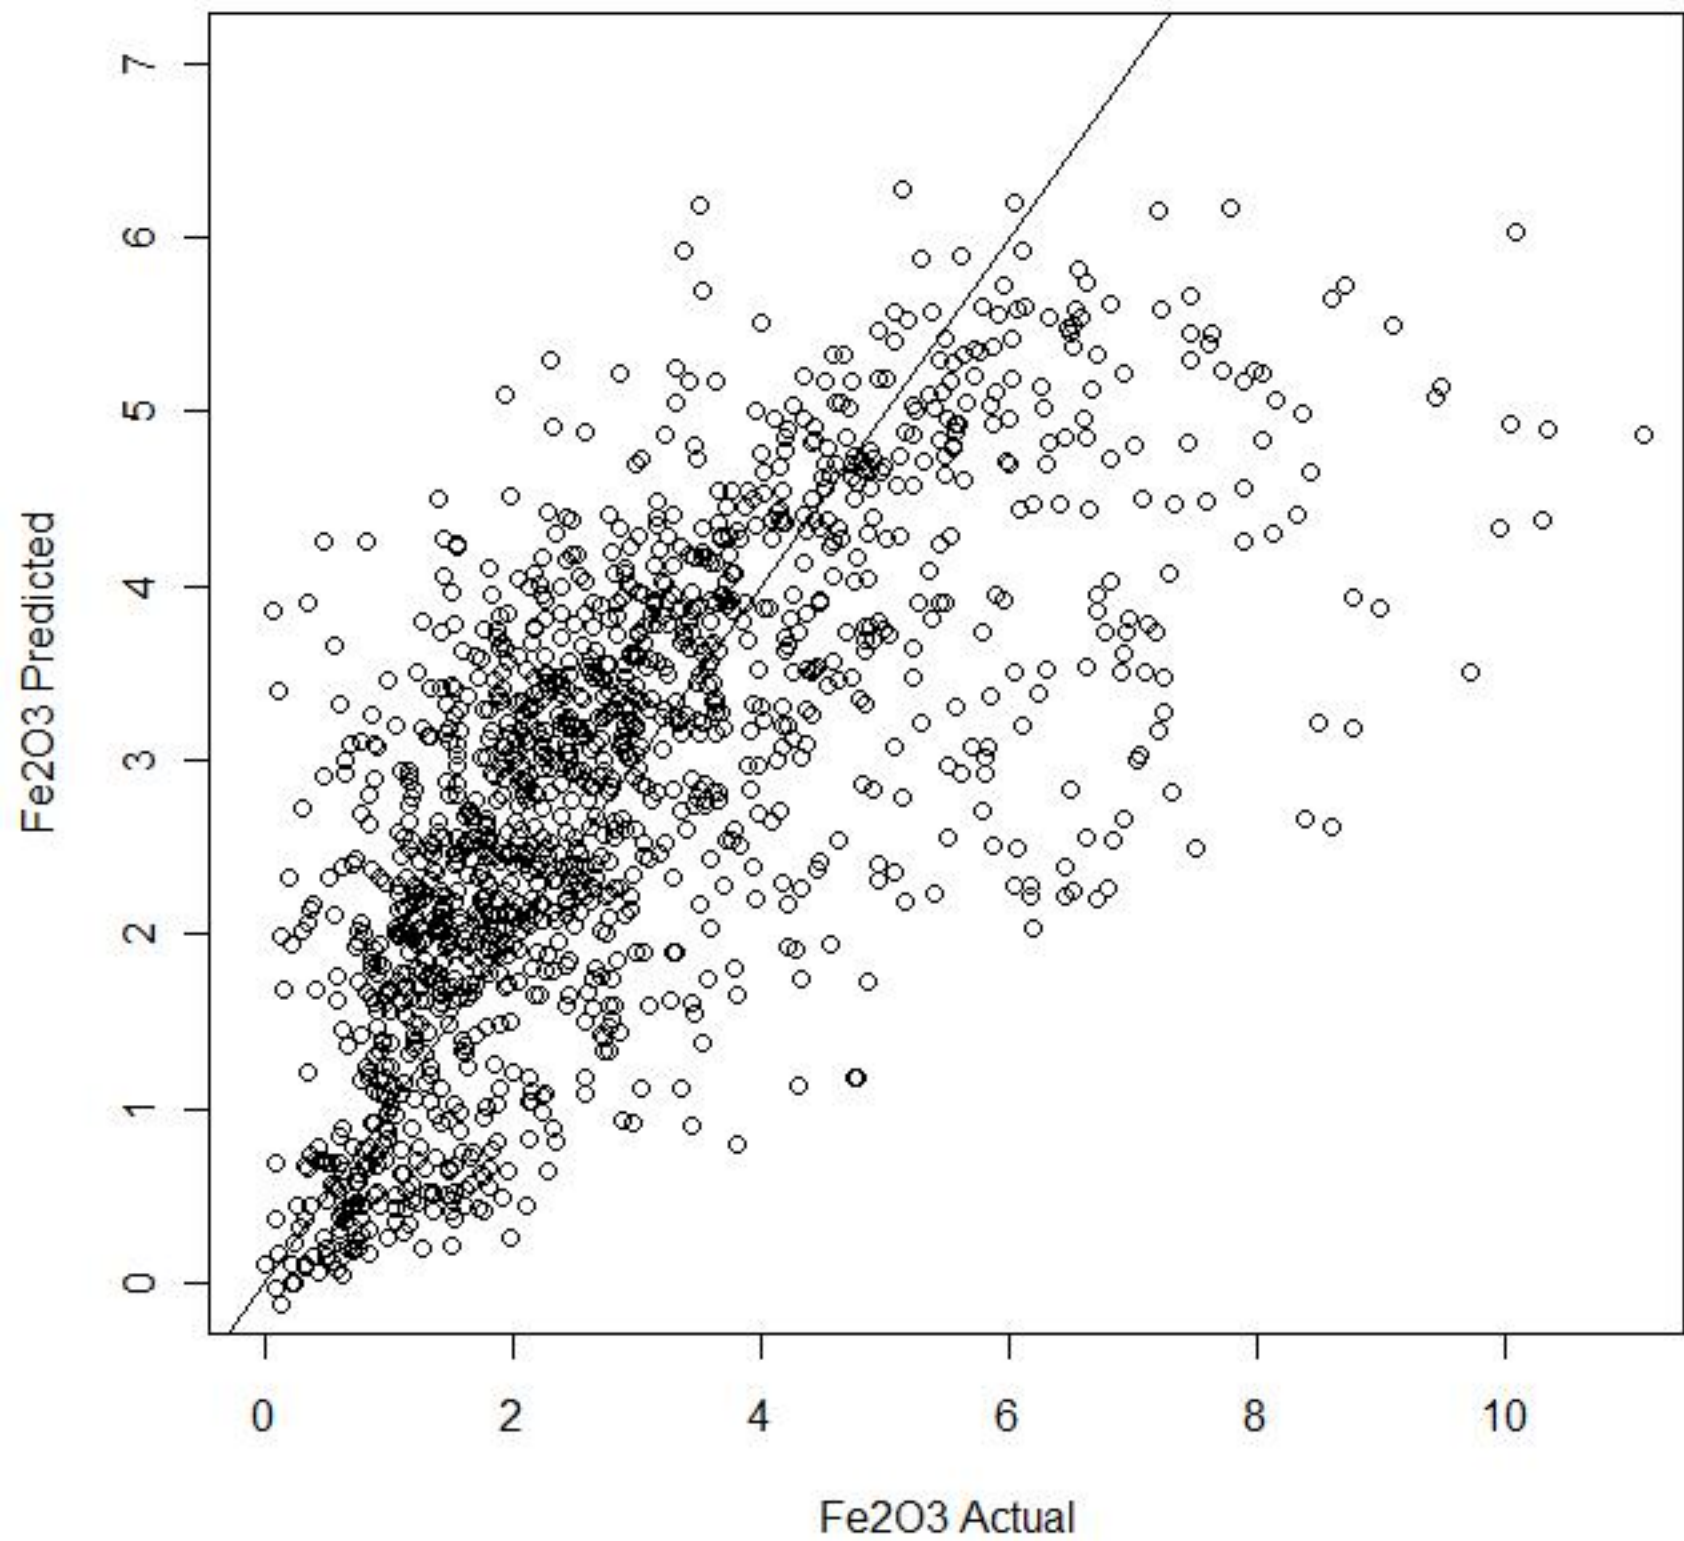

Supplement: Supplementary file 5 [file 1]
